# Supplementary material
Source: publisher figshare collection journal article supplement (https://tandf.figshare.com/ndownloader/files/12285734)
Supplement: Supplementary file 1 [file 12285734]

| **Database** | **URL** | **Database size** | **Contents** | **Reference** |
| --- | --- | --- | --- | --- |
| **DGV**:  Database of Genomic Variants | <http://projects.tcag.ca/variation/> | >22,300 | CNV database of healthy controls | 24174537 |
| **DECIPHER**:  DatabasE of genomiC varIation and Phenotype in Humans using Ensembl Resources | <http://decipher.sanger.ac.uk/> | > 21,000 (~9000 samples with public access) | CNV and SNV database of patients with genotype and phenotype data | 24150940 |
| **dbSNP**:  The Database of Short Genetic Variation | <http://www.ncbi.nlm.nih.gov/snp/> | > 260 million submitted SNP (ss) and over 62 million Reference SNP (rs) clusters. | Public archive of all short sequence variations. | PMID:  10592272  (dbSNP build -141) |
| **EVS**:  Exome Variant Server/ NHLBI Exome Project | <http://evs.gs.washington.edu/EVS/> | 6,503 samples drawn from multiple WES cohorts and represents all of the exome variant data. | Datasets from diverse and richly-phenotype populations. | v.0.0.30  (Nov.3,2014) |
| **1000G**:  The 1000 Genomes Project | [http://www.1000genomes.org](http://www.1000genomes.org/) | 1,092 genomes | A Deep Catalog of Human Genetic Variation | PMID:  23128226 |
| **HAPMAP**:  The International HapMap (haplotype map) Project | <http://hapmap.ncbi.nlm.nih.gov/> | 1,184 samples (genotyping) | A catalog of common genetic variants that occur in different population. | PMID: 14685227 |
| **OMIM**:  Online Mendelian Inheritance in Man | <http://www.ncbi.nlm.nih.gov/omim/> | 22,829 entries | A Catalog of Human Genes and Genetic Disorders | PMID:  15608251 |
| **COSMIC**:  Catalogue Of Somatic Mutations In Cancer | <http://www.sanger.ac.uk/cosmic> | 2,002,811 coding point mutations | A Catalogue Of Somatic Mutations found in different human cancer. | PMID:  15188009 |
| **ExAC** :  The Exome Aggregation Consortium Browser (Beta) | [http://exac.broadinstitute.org](http://exac.broadinstitute.org/) | 61,486 exome sequencing data from unrelated individuals. | Publicly accessible data set use as a global "reference set". | Version 0.3 |

**Table Supp1: Summary of the databases for WES analysis**
